# Supplementary material
Source: ML conference proceedings conference paper supplement (https://proceedings.neurips.cc/paper_files/paper/2023/hash/400a2e6a82520b690810b97fd67fcc4e-Abstract.html)
Supplement: Supplementary file 1 [file 400a2e6a82520b690810b97fd67fcc4e-Supplemental-Conference.pdf]

## A Winograd transformation matrices

Depending on the particular choice of Winograd domain (i.e., polynomial domain), transformation matrices  $A$ ,  $B$ , and  $G$  in the Winograd algorithm can be different. In the paper, we present that the most popular interpolation points for F(2,3) are  $[0, +1, -1]$  and then these transformation matrices can be constructed as follows:

$$A^T = \begin{bmatrix} 1 & 1 & 1 & 0 \\ 0 & 1 & -1 & -1 \end{bmatrix}, \quad B^T = \begin{bmatrix} 1 & 0 & -1 & 0 \\ 0 & 1 & 1 & 0 \\ 0 & -1 & 1 & 0 \\ 0 & 1 & 0 & -1 \end{bmatrix}, \quad G = \begin{bmatrix} 1 & 0 & 0 \\ \frac{1}{2} & \frac{1}{2} & \frac{1}{2} \\ \frac{1}{2} & -\frac{1}{2} & \frac{1}{2} \\ 0 & 0 & 1 \end{bmatrix} \quad (1)$$

For F(4,3) and F(6,3), we choose the same transformation matrices as BQW [1]. For F(4,3), the Winograd transformation matrices are as follows:

$$A^T = \begin{bmatrix} 1 & 1 & 1 & 1 & 1 & 0 \\ 0 & 1 & -1 & 2 & -2 & 0 \\ 0 & 1 & 1 & 4 & 4 & 0 \\ 0 & 1 & -1 & 8 & -8 & 1 \end{bmatrix}, \quad (2)$$

$$B^T = \begin{bmatrix} 4 & 0 & -5 & 0 & 1 & 0 \\ 0 & -4 & -4 & 1 & 1 & 0 \\ 0 & 4 & -4 & -1 & 1 & 0 \\ 0 & -2 & -1 & 2 & 1 & 0 \\ 0 & 2 & -1 & -2 & 1 & 0 \\ 0 & 4 & 0 & -5 & 0 & 1 \end{bmatrix}, \quad (3)$$

$$G = \begin{bmatrix} \frac{1}{4} & 0 & 0 \\ -\frac{1}{6} & -\frac{1}{6} & -\frac{1}{6} \\ -\frac{1}{6} & \frac{1}{6} & -\frac{1}{6} \\ \frac{1}{24} & \frac{1}{12} & -\frac{1}{6} \\ \frac{1}{24} & -\frac{1}{12} & -\frac{1}{6} \\ 0 & 0 & 1 \end{bmatrix} \quad (4)$$

For F(6,3), the Winograd transformation matrices are as follows:

$$A^T = \begin{bmatrix} 1 & 1 & 1 & 1 & 1 & 0 \\ 0 & 1 & -1 & 2 & -2 & 0 \\ 0 & 1 & 4 & 4 & 0 & 0 \\ 0 & 1 & -1 & 8 & -8 & 1 \end{bmatrix}, \quad (5)$$

$$B^T = \begin{bmatrix} 1 & 0 & -\frac{21}{4} & 0 & \frac{21}{4} & 0 & -1 & 0 \\ 0 & 1 & 1 & -\frac{17}{4} & -\frac{17}{4} & 1 & 1 & 0 \\ 0 & -1 & 1 & \frac{17}{4} & -\frac{17}{4} & -1 & 1 & 0 \\ 0 & \frac{1}{2} & \frac{1}{4} & -\frac{5}{2} & -\frac{5}{4} & 2 & 1 & 0 \\ 0 & -\frac{1}{2} & \frac{1}{4} & \frac{5}{2} & -\frac{5}{4} & -2 & 1 & 0 \\ 0 & 2 & 4 & -\frac{5}{2} & -5 & \frac{1}{2} & 1 & 0 \\ 0 & -2 & 4 & \frac{5}{2} & -5 & -\frac{1}{2} & 1 & 0 \\ 0 & -1 & 0 & \frac{21}{4} & 0 & -\frac{21}{4} & 0 & 1 \end{bmatrix}, \quad (6)$$

$$G = \begin{bmatrix} 1 & 0 & 0 \\ -\frac{2}{9} & -\frac{2}{9} & -\frac{2}{9} \\ -\frac{1}{9} & \frac{2}{9} & -\frac{1}{9} \\ \frac{1}{90} & \frac{1}{45} & -\frac{2}{45} \\ \frac{1}{90} & -\frac{1}{45} & \frac{2}{45} \\ \frac{32}{45} & \frac{16}{45} & \frac{8}{45} \\ \frac{45}{32} & \frac{45}{16} & \frac{45}{8} \\ \frac{45}{45} & -\frac{16}{45} & \frac{45}{45} \\ 0 & 0 & 1 \end{bmatrix} \quad (7)$$

## B Derivatives of transformation matrices

In the paper, in order to align these transformation procedures after quantization, we propose to adjust transformation matrices via an optimization procedure as follows:

$$\underset{A,B,G}{\operatorname{argmin}} \mathbb{E}_{X \sim \mathcal{D}} \left[ \sum_f^{C_o} \|A^T (\sum_c^{C_i} Q(B^T X_c B) \odot Q(GW_{f,c} G^T)) A - Y_f\|^2 \right] \quad (8)$$

By using the straight-through estimator [2] to approximate the gradient through the round function as a pass-through operation, we can obtain the derivatives of  $A$ ,  $B$  and  $G$ . In this paper, we directly present the derivative of  $B$ . Here, a more comprehensive derivation is provided as follows:

$$\frac{\partial \mathcal{L}}{\partial B_{ij}} = \sum_f^{C_o} \operatorname{tr} \left\{ \frac{\partial \mathcal{L}}{\partial O_f^T} \cdot \frac{\partial O_f}{\partial B_{ij}} \right\} \quad (9)$$

$$= \sum_f^{C_o} \operatorname{tr} \left\{ \frac{\partial \mathcal{L}}{\partial O_f^T} \cdot \left[ \sum_c^{C_i} (\delta_{ji} X_c B) \odot Q(V_{f,c}) + (B^T X_c \delta_{i,j}) \odot Q(V_{f,c}) \right] \right\} \quad (10)$$

$$= \sum_f^{C_o} \sum_c^{C_i} \operatorname{tr} \left\{ \frac{\partial \mathcal{L}}{\partial O_f^T} \cdot [(\delta_{ji} X_c B) \odot Q(V_{f,c})] + \frac{\partial \mathcal{L}}{\partial O_f^T} \cdot [(B^T X_c \delta_{i,j}) \odot Q(V_{f,c})] \right\} \quad (11)$$

$$= \sum_f^{C_o} \sum_c^{C_i} \operatorname{tr} \left\{ (\delta_{ji} X_c B)^T \cdot \left[ \frac{\partial \mathcal{L}}{\partial O_f} \odot Q(V_{f,c}) \right] + (B^T X_c \delta_{i,j})^T \cdot \left[ \frac{\partial \mathcal{L}}{\partial O_f} \odot Q(V_{f,c}) \right] \right\} \quad (12)$$

$$= \sum_f^{C_o} \sum_c^{C_i} \left[ X_c B \cdot \left( \frac{\partial \mathcal{L}}{\partial O_f} \odot Q(V_{f,c}) \right)^T \right]_{ij} + \left[ X_c^T B \cdot \left( \frac{\partial \mathcal{L}}{\partial O_f} \odot Q(V_{f,c}) \right) \right]_{ij} \quad (13)$$

We have obtained the derivative of  $B_{ij}$ , and now we can provide the expression for the derivative of  $B$ :

$$\frac{\partial \mathcal{L}}{\partial B} = \sum_f^{C_o} \sum_c^{C_i} X_c B \left( \frac{\partial \mathcal{L}}{\partial O_f} \odot Q(V_{f,c}) \right)^T + X_c^T B \left( \frac{\partial \mathcal{L}}{\partial O_f} \odot Q(V_{f,c}) \right) \quad (14)$$

The derivatives of  $A$ ,  $G$  and  $O_f$  can be computed in a similar manner:

$$\frac{\partial \mathcal{L}}{\partial A} = \sum_f^{C_o} O_f^T A (A^T O_f A - Y_f) + O_f A (A^T O_f A - Y_f)^T \quad (15)$$

$$\frac{\partial \mathcal{L}}{\partial G} = \sum_f^{C_o} \sum_c^{C_i} \left( \frac{\partial \mathcal{L}}{\partial O_f} \odot Q(U_c) \right) G W_{f,c}^T + \left( \frac{\partial \mathcal{L}}{\partial O_f} \odot Q(U_c) \right)^T G W_{f,c} \quad (16)$$

$$\frac{\partial \mathcal{L}}{\partial O_f} = 2A(A^T O_f A - Y)A^T \quad (17)$$

## C Optimal quantization scale for Gaussian variables

In Theorem 1, in order to demonstrate that the optimal per-pixel scale  $S$  can be factorized into vectors, we rely on the conclusion that the optimal scale  $s^*$  to minimize the mean-square error of quantization of Gaussian variables  $z \sim \mathcal{N}(0, \sigma^2)$  is proportional to  $\sigma$ , i.e.,  $s^* = K\sigma$ , where  $K$  is a constant. Here, we will provide a proof of it.

**Theorem C.1.** *Assuming  $z \sim \mathcal{N}(0, \sigma^2)$ , the optimal scale  $s^*$  to minimize the mean-square error of quantization of  $z$  is proportional to the standard deviation  $\sigma$ , i.e.,  $s^* = K\sigma$ , where  $K$  is a constant.*

*Proof.* Because  $z \sim \mathcal{N}(0, \sigma^2)$ ,  $z$  can be reparameterized as  $z = \sigma \cdot u$ , where  $u \sim \mathcal{N}(0, 1)$ .

$$\mathbf{E} [(Q(z) - z)^2] = \int_{-\infty}^{\infty} p_z(z)(Q(z) - z)^2 dz \quad (18)$$

$$= \int_{-\infty}^{\infty} p_u(u)(Q(\sigma u) - \sigma u)^2 du \quad (19)$$

$$= \int_{-\infty}^{\infty} p_u(u) \text{clip}\left(\left\lfloor \frac{\sigma u}{s} \right\rfloor, -q_{min}, q_{max}\right) \cdot s - \sigma u)^2 du \quad (20)$$

$$= \sigma^2 \int_{-\infty}^{\infty} p_u(u) \text{clip}\left(\left\lfloor \frac{u}{s/\sigma} \right\rfloor, -q_{min}, q_{max}\right) \cdot \frac{s}{\sigma} - u)^2 du \quad (21)$$

$$= \sigma^2 h\left(\frac{s}{\sigma}\right) \quad (22)$$

Eq. (18) can be treated as a function of  $s/\sigma$  when solving for  $s$  with  $\sigma$  as a known value. Assuming  $K$  minimizes function  $h(x)$ , i.e.,  $K = \underset{x}{\operatorname{argmin}} h(x)$ , we have:

$$s^* = \underset{s}{\operatorname{argmin}} \mathbf{E} [(Q(z) - z)^2] = \underset{s}{\operatorname{argmin}} \sigma^2 h\left(\frac{s}{\sigma}\right) = K \cdot \sigma \quad (23)$$

□

## D Experiments on other architectures

In Section 5, we compare our methods to previous work BQW[1] on the ResNet model family with comprehensive experiment settings, including various bit widths, tile sizes, and datasets. Here, we present a similar analysis for two other popular architectures VGG and Squeezenet using the Cifar-10 dataset. The results are shown in Table 1 and Table 2. These results align with our analysis in Section 5. Our PTQ-Aware Winograd (PAW) method outperforms the strong baseline introduced in Section 5 and our FSQ method is well-compatible with PAW.

Table 1: PTQ results of VGG11 on CIFAR-10.

| Model              | Tile   | Bits | Partial Quantization |       | Full Quantization |         |
|--------------------|--------|------|----------------------|-------|-------------------|---------|
|                    |        |      | Baseline             | PAW   | FSQ               | FSQ+PAW |
| VGG-11<br>(92.02%) | F(4,3) | 6    | 89.13                | 91.56 | 86.59             | 91.55   |
|                    |        | 8    | 92.02                | 92.28 | 90.82             | 91.83   |
|                    | F(6,3) | 6    | 75.10                | 89.94 | 68.98             | 90.34   |
|                    |        | 8    | 91.27                | 91.88 | 88.44             | 91.63   |

Table 2: PTQ results of SqueezeNet on CIFAR-10.

| Model                  | Tile   | Bits | Partial Quantization |       | Full Quantization |         |
|------------------------|--------|------|----------------------|-------|-------------------|---------|
|                        |        |      | Baseline             | PAW   | FSQ               | FSQ+PAW |
| SqueezeNet<br>(92.62%) | F(4,3) | 6    | 89.69                | 91.98 | 88.66             | 91.78   |
|                        |        | 8    | 92.61                | 92.68 | 92.01             | 92.80   |
|                        | F(6,3) | 6    | 80.50                | 90.67 | 76.48             | 91.26   |
|                        |        | 8    | 92.37                | 92.61 | 90.54             | 92.42   |

## References

- [1] Vladimir Chikin and Vladimir Kryzhanovskiy. Channel balancing for accurate quantization of winograd convolutions. In *IEEE/CVF Conference on Computer Vision and Pattern Recognition, CVPR 2022, New Orleans, LA, USA, June 18-24, 2022*, pages 12497–12506. IEEE, 2022.
- [2] Yoshua Bengio, Nicholas Léonard, and Aaron C. Courville. Estimating or propagating gradients through stochastic neurons for conditional computation. *CoRR*, abs/1308.3432, 2013.
